# Supplementary material for: A new strategy for co-assembling π-conjugated polymer/cadmium sulfide hybrids into an efficient charge-transporting nanochannel array by using an all-conjugated diblock copolymer motif
Source: Royal Society of Chemistry journal article supplement (doi:10.1039/c4ta00754a), 2014-05-15
Supplement: c4ta00754a1.pdf [file c4ta00754a1.pdf]

Supporting Information for:

**A New Strategy for Co-Assembling  $\pi$ -Conjugated Polymer/Cadmium Sulfide Hybrids into Efficient Charge-Transporting Nanochannel Array by Using All-Conjugated Diblock Copolymer Motif**

Yi-Huan Lee,<sup>1,2</sup> Yu-Ping Lee,<sup>1</sup> Chi-Ju Chiang,<sup>1</sup> Fan-Kai Wei,<sup>1</sup> Chia-Hung Wu,<sup>1</sup> Wei-Chih Chen,<sup>2</sup> Ching Shen,<sup>1</sup> Huai-An Jeng,<sup>3</sup> Leeyih Wang,<sup>2,4</sup> Ming-Wei Liu,<sup>5,6</sup> Yi-Fan Chen,<sup>7</sup> Tsutomu Yokozawa,<sup>8</sup> and Chi-An Dai<sup>\*1,2</sup>

<sup>1</sup>Department of Chemical Engineering, National Taiwan University, Taipei 10617, Taiwan

<sup>2</sup>Institute of Polymer Science and Engineering, National Taiwan University, Taipei 10617, Taiwan

<sup>3</sup>Department of Chemical Engineering, University of Waterloo, ON, Canada N2L 3G1

<sup>4</sup>Center for Condensed Matter Sciences, National Taiwan University, Taipei 10617, Taiwan

<sup>5</sup>Department of Cosmetic Applications and Management, Mackey Junior College of Medicine, Nursing, and Management, Taipei 11260, Taiwan

<sup>6</sup>Taiwan Adventist Hospital, Taipei 10556, Taiwan

<sup>7</sup>Department of Chemical and Materials Engineering, National Central University, Zhongli, 32001 Taiwan

<sup>8</sup>Department of Material and Life Chemistry, Kanagawa University, Rokkakubashi, Kanagawa-ku, Yokohama 221-8686, Japan

\* Corresponding author: Chi-An Dai, Professor

Address: No. 1, Roosevelt Rd. Sec. 4, Department of Chemical Engineering, National Taiwan University, Taipei 10617 Taiwan

## **Materials.**

All reagents and chemicals were purchased from Aldrich Chemical and carried out under purified nitrogen. Before use, ether and tetrahydrofuran (THF) were dried over sodium metal and freshly distilled. All other reagents and solvents were used as received.

## **Synthesis and Characterization of PPP-P3HT block copolymers.**

First, 1,4-dibromo-2,5-dihexyloxybenzene and 2,5-dibromo-3-hexylthiophene monomers were synthesized by following previous reports.<sup>1-4</sup> Subsequently, 1,4-dibromo-2,5-dihexyloxybenzene was added into dried THF solvent (in flask A) and the solution was stirred under dry nitrogen. After a complete mixing, isopropylmagnesium chloride was added via syringe and the resulting mixture was refluxed at 70°C. After 2 hrs, the solution was cooled to room temperature, followed by adding [1,3-bis(diphenylphosphino)ethane]dichloronickel(II) (Ni(dppe)Cl<sub>2</sub>) into the flask. Upon stirring for 2 hrs, a living PPP block was first obtained. Meanwhile, in an another flask (flask B), 2,5-dibromo-3-hexylthiophene monomers were mixed with THF, followed by a reaction with isopropylmagnesium chloride at 70°C for 2 hrs. Compounds in flask A and B were mixed together and stirred for another 2 hrs. Finally, the desired product was precipitated into methanol and washed by using Soxhlet apparatus with methanol and toluene solvents.

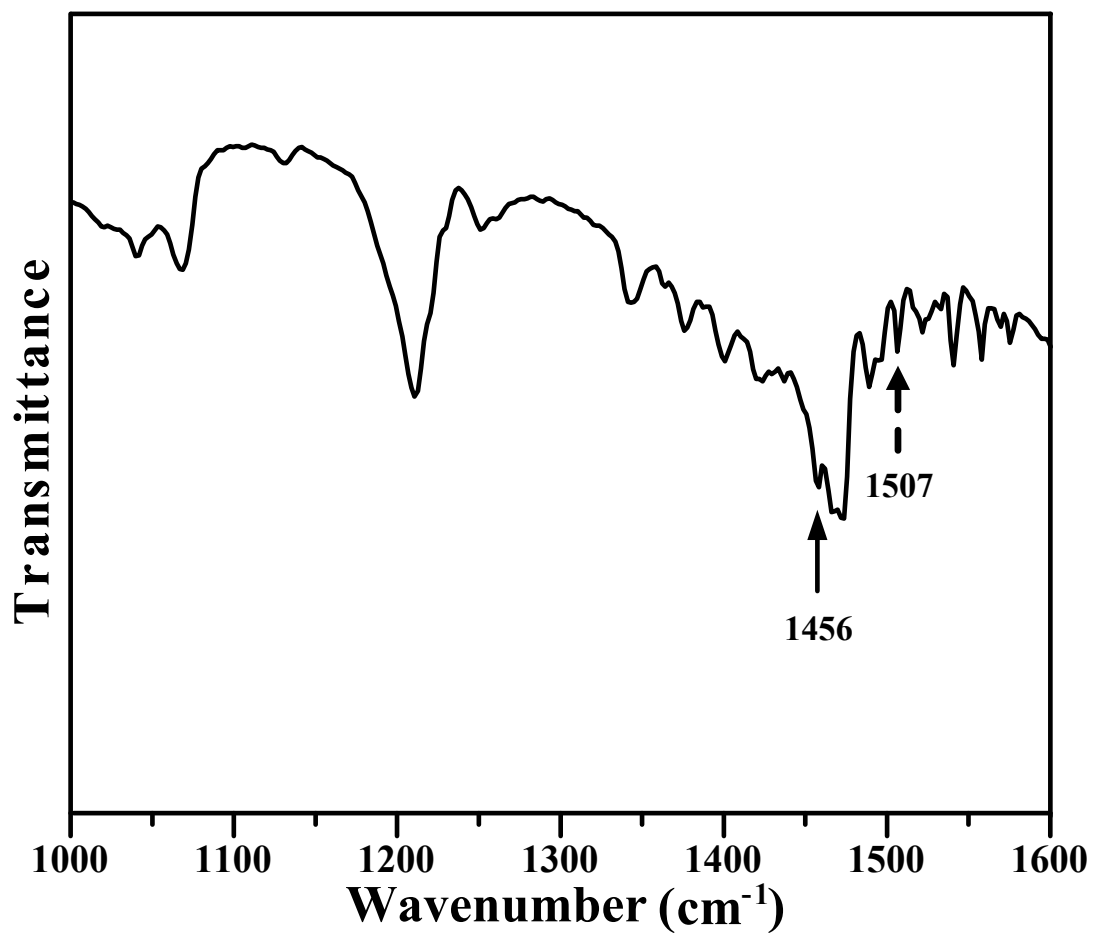

**Figure S1.** FTIR spectrum of pristine PPP homopolymer. The solid arrow indicates the signal of symmetric aromatic C=C stretching of PPP segments. The dashed arrow indicates the characteristic bands of PPP associated with the asymmetric aromatic C=C stretching.

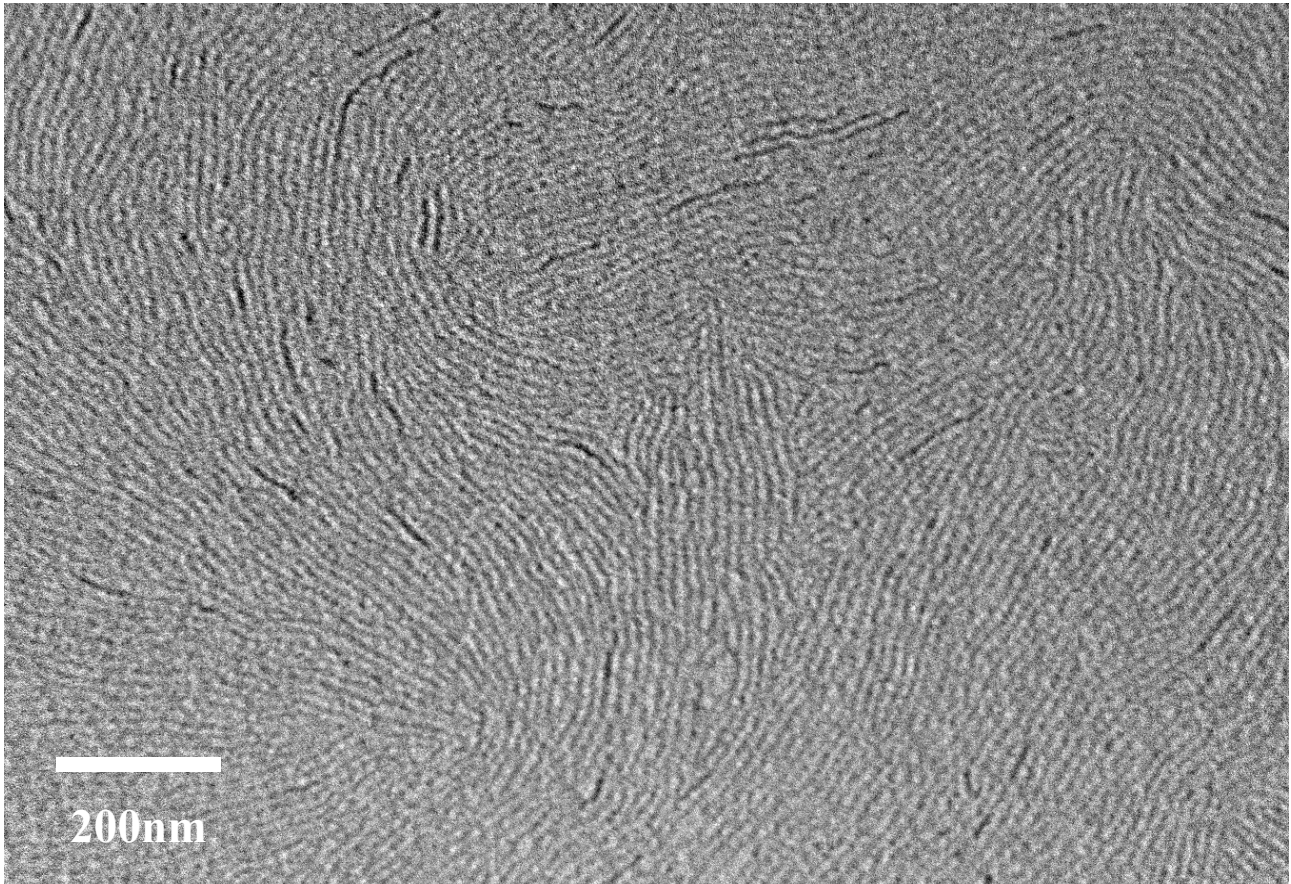

**Figure S2.** Low magnification TEM image of the PPP-P3HT/CdS-OH hybrid film with 3HT:CdS = 7:1.

References:

1. R. Miyakoshi, K. Shimono, A. Yokoyama and T. Yokozawa, *J. Am. Chem. Soc.*, 2006, **128**, 16012-16013.
2. R. Miyakoshi, A. Yokoyama and T. Yokozawa, *Chem. Lett.*, 2008, **37**, 1022-1023.
3. R. S. Lowe, S. M. Khersonsky and R. D. McCullough, *Adv. Mater.*, 1999, **11**, 250-253.
4. R. S. Lowe, P. C. Ewbank, J. Liu, L. Zhai and R. D. McCullough, *Macromolecules*, 2001, **34**, 4324-4333.
